# Supplementary material
Source: PubMed Central journal article supplement (PMC5672944)
Supplement: NIHMS493779-supplement-1_si_001.pdf [file NIHMS493779-supplement-1_si_001.pdf]

## Supporting Information

### Chronic Ethanol Consumption Alters Mammalian Gastrointestinal Content Metabolites

**Guoxiang Xie,<sup>†,‡,§</sup> Wei Zhong,<sup>†</sup> Xiaojiao Zheng,<sup>†</sup> Qiong Li,<sup>†</sup> Yunping Qiu,<sup>†</sup> Houkai Li,<sup>†</sup> Huiyuan  
Chen,<sup>†</sup> Zhanxiang Zhou,<sup>†,\*</sup> and Wei Jia<sup>‡,§,\*</sup>**

<sup>†</sup>Center for Translational Biomedical Research, University of North Carolina at Greensboro,  
North Carolina Research Campus, Kannapolis, North Carolina 28081, USA

<sup>‡</sup>Center for Translational Medicine, Shanghai Jiao Tong University Affiliated Sixth People's  
Hospital, Shanghai 200233, China

<sup>§</sup>University of Hawaii Cancer Center, Honolulu, Hawaii 96813, USA

**Table S1.** Compositions of modified Lieber-DeCarli control and ethanol liquid diets for step-wise feeding procedure.

|                                | Control | Ethanol | Ethanol | Ethanol | Ethanol |
|--------------------------------|---------|---------|---------|---------|---------|
| Weeks                          | 1-8     | 1-2     | 3-4     | 5-6     | 7-8     |
| Ingredients (g/L)              |         |         |         |         |         |
| Casein                         | 36.8    | 36.8    | 36.8    | 36.8    | 36.8    |
| L-Cystine                      | 0.5     | 0.5     | 0.5     | 0.5     | 0.5     |
| DL-Methionine                  | 0.3     | 0.3     | 0.3     | 0.3     | 0.3     |
| Corn oil                       | 34.8    | 34.8    | 34.8    | 34.8    | 34.8    |
| Safflower oil                  | 3.0     | 3.0     | 3.0     | 3.0     | 3.0     |
| Cellulose                      | 10.0    | 10.0    | 10.0    | 10.0    | 10.0    |
| Choline bitartrate             | 0.53    | 0.53    | 0.53    | 0.53    | 0.53    |
| Salt mix                       | 8.75    | 8.75    | 8.75    | 8.75    | 8.75    |
| Vitamin mix                    | 2.5     | 2.5     | 2.5     | 2.5     | 2.5     |
| Maltose dextrin                | 115.2   | 33.1    | 30.6    | 28.1    | 25.6    |
| Ethanol                        | -       | 50.0    | 51.4    | 52.9    | 54.3    |
| Calories (% of total calories) |         |         |         |         |         |
| Protein                        | 16      | 16      | 16      | 16      | 16      |
| Fat                            | 34      | 34      | 34      | 34      | 34      |
| Carbohydrate                   | 50      | 15      | 14      | 13      | 12      |
| Ethanol                        | -       | 35      | 36      | 37      | 38      |
| Total                          | 100     | 100     | 100     | 100     | 100     |

**Table S2.** Metabolites identified in gastrointestinal contents derived from LC-TOFMS analysis.

| No. | Compound                         | Pathway                      | Library* | Retention time (min) | m/z      |
|-----|----------------------------------|------------------------------|----------|----------------------|----------|
| 1   | Acetylcholine                    | Alcohols and Polyols         | Std      | 3.70                 | 147.1129 |
| 2   | Choline                          | Alcohols and Polyols         | Std      | 4.10                 | 105.107  |
| 3   | 5'-Hydroxycotinine               | Alkaloids and Derivatives    | HMDB     | 7.27                 | 191.0845 |
| 4   | Cotinine                         | Alkaloids and Derivatives    | Std      | 4.15                 | 177.0968 |
| 5   | 3-Dehydroxycarnitine             | Alkylamines                  | HMDB     | 4.43                 | 146.1167 |
| 6   | Carnitine                        | Alkylamines                  | Std      | 4.21                 | 162.1095 |
| 7   | 2-Aminomuconic acid semialdehyde | Amino Acids and Derivatives  | HMDB     | 4.16                 | 142.0464 |
| 8   | 2-Methylbutyrylglycine           | Amino Acids and Derivatives  | HMDB     | 20.92                | 158.0827 |
| 9   | 3,4-Dehydro-DL-proline           | Amino Acids and Derivatives  | Std      | 4.35                 | 114.0648 |
| 10  | 3,4-dihydroxyphenylalanine       | Amino Acids and Derivatives  | Std      | 4.18                 | 198.0848 |
| 11  | 3-Methylhistidine                | Amino Acids and Derivatives  | HMDB     | 24.08                | 170.0962 |
| 12  | Alanine                          | Amino Acids and Derivatives  | Std      | 4.15                 | 90.05414 |
| 13  | Arginine                         | Amino Acids and Derivatives  | Std      | 4.06                 | 175.1166 |
| 14  | Argininic acid                   | Amino Acids and Derivatives  | HMDB     | 4.95                 | 176.1027 |
| 15  | Aspartic acid                    | Amino Acids and Derivatives  | Std      | 4.12                 | 134.0421 |
| 16  | Aspartyllysine                   | Amino Acids and Derivatives  | HMDB     | 20.40                | 262.1386 |
| 17  | Citrulline                       | Amino Acids and Derivatives  | Std      | 3.90                 | 174.0871 |
| 18  | Cystine                          | Amino Acids and Derivatives  | Std      | 3.69                 | 239.021  |
| 19  | Delta-hydroxylysine              | Amino Acids and Derivatives  | Std      | 3.94                 | 161.0775 |
| 20  | Gamma-Aminobutyric acid          | Amino Acids and Derivatives  | Std      | 3.91                 | 102.0747 |
| 21  | Glutamic acid                    | Amino Acids and Derivatives  | Std      | 4.20                 | 148.0599 |
| 22  | Hexanoylglycine                  | Amino Acids and Derivatives  | HMDB     | 3.71                 | 172.1018 |
| 23  | Homocitrulline                   | Amino Acids and Derivatives  | HMDB     | 20.26                | 190.1201 |
| 24  | L-beta-aspartyl-L-glycine        | Amino Acids and Derivatives  | HMDB     | 3.81                 | 191.0667 |
| 25  | L-beta-aspartyl-L-leucine        | Amino Acids and Derivatives  | HMDB     | 7.00                 | 247.1291 |
| 26  | L-gamma-glutamyl-L-leucine       | Amino Acids and Derivatives  | HMDB     | 20.38                | 261.1421 |
| 27  | L-gamma-glutamyl-L-valine        | Amino Acids and Derivatives  | HMDB     | 20.25                | 247.1265 |
| 28  | N6,N6,N6-Trimethyl-L-lysine      | Amino Acids and Derivatives  | HMDB     | 18.70                | 187.1408 |
| 29  | N-Alpha-acetyllysine             | Amino Acids and Derivatives  | HMDB     | 19.96                | 187.1122 |
| 30  | Ornithine                        | Amino Acids and Derivatives  | Std      | 3.77                 | 131.0818 |
| 31  | Proline                          | Amino Acids and Derivatives  | Std      | 4.44                 | 116.0705 |
| 32  | Selenohomocysteine               | Amino Acids and Derivatives  | HMDB     | 3.59                 | 180.9678 |
| 33  | Succinyladenosine                | Amino Acids and Derivatives  | HMDB     | 20.03                | 384.1171 |
| 34  | Threonine                        | Amino Acids and Derivatives  | Std      | 4.13                 | 120.0617 |
| 35  | Imidazoleacetic acid             | Azoles                       | HMDB     | 18.23                | 127.049  |
| 36  | Benzaldehyde                     | Benzaldehydes                | HMDB     | 20.03                | 107.0488 |
| 37  | 4-Hydroxy-3-methylbenzoic acid   | Benzoic Acid and Derivatives | HMDB     | 19.50                | 153.0598 |
| 38  | 5-Hydroxykynurenamine            | Benzoic Acid and Derivatives | HMDB     | 3.93                 | 179.0809 |
| 39  | Monoisobutyl phthalic acid       | Benzoic Acid and Derivatives | HMDB     | 24.74                | 221.0822 |

|    |                                            |                                          |      |       |          |
|----|--------------------------------------------|------------------------------------------|------|-------|----------|
| 40 | 3-Hydroxycoumarin                          | Benzopyrans                              | HMDB | 3.41  | 161.0189 |
| 41 | Alpha-CEHC                                 | Benzopyrans                              | HMDB | 20.49 | 279.1635 |
| 42 | 2,3-Dihydroxysuccinic acid                 | Carboxylic Acids and Derivatives         | Std  | 4.12  | 149.0646 |
| 43 | 2-Methylcitric acid                        | Carboxylic Acids and Derivatives         | HMDB | 3.84  | 207.0461 |
| 44 | Dodecanedioic acid                         | Carboxylic Acids and Derivatives         | Std  | 20.41 | 231.1657 |
| 45 | Malonic semialdehyde                       | Carboxylic Acids and Derivatives         | HMDB | 3.61  | 89.02357 |
| 46 | Cinnamic acid                              | Cinnamic Acid Derivatives                | Std  | 20.03 | 149.059  |
| 47 | 1,3-Dimethyluracil                         | Diazines                                 | HMDB | 4.78  | 141.0652 |
| 48 | 5-Acetylamino-6-formylamino-3-methyluracil | Diazines                                 | HMDB | 3.88  | 225.0636 |
| 49 | Dihydrouracil                              | Diazines                                 | Std  | 4.41  | 115.0382 |
| 50 | Leukotriene E3                             | Eicosanoids                              | HMDB | 20.44 | 442.2588 |
| 51 | 3-Methylglutarylcamitine                   | Fatty Acid Esters                        | HMDB | 19.99 | 290.1636 |
| 52 | (R)-3-Hydroxy-Octadecanoic acid            | Fatty Acids and Conjugates               | HMDB | 23.00 | 299.2543 |
| 53 | 17-HDoHE                                   | Fatty Acids and Conjugates               | HMDB | 21.05 | 345.2386 |
| 54 | 19,20-DiHDP A                              | Fatty Acids and Conjugates               | HMDB | 21.20 | 363.2493 |
| 55 | 2-Ethylacrylic acid                        | Fatty Acids and Conjugates               | HMDB | 4.66  | 101.0603 |
| 56 | 2-Oxo-4-methylthiobutanoic acid            | Fatty Acids and Conjugates               | HMDB | 24.74 | 149.0231 |
| 57 | 2-Oxoarginine                              | Fatty Acids and Conjugates               | HMDB | 4.74  | 174.0889 |
| 58 | 3-Oxo-octadecanoic acid                    | Fatty Acids and Conjugates               | HMDB | 23.73 | 299.2566 |
| 59 | Bisnorbiotin                               | Fatty Acids and Conjugates               | HMDB | 3.86  | 215.0481 |
| 60 | Docosahexaenoic acid                       | Fatty Acids and Conjugates               | HMDB | 21.77 | 329.2453 |
| 61 | Elaidic acid                               | Fatty Acids and Conjugates               | HMDB | 23.45 | 283.262  |
| 62 | Maleic acid                                | Fatty Acids and Conjugates               | Std  | 4.64  | 115.0115 |
| 63 | Tetracosahexaenoic acid                    | Fatty Acids and Conjugates               | HMDB | 24.55 | 357.2772 |
| 64 | 4-Hydroxynonenal                           | Fatty Alcohols                           | HMDB | 23.46 | 157.1223 |
| 65 | Oleamide                                   | Fatty Amides                             | HMDB | 23.73 | 282.2771 |
| 66 | Palmitoylethanolamide                      | Fatty Amides                             | HMDB | 22.15 | 300.288  |
| 67 | N1-Methyl-2-pyridone-5-carboxamide         | Hydropyridines                           | HMDB | 11.34 | 151.0464 |
| 68 | 3-Hydroxypropionic Acid                    | Hydroxy Acids and Derivatives            | Std  | 6.03  | 89.03857 |
| 69 | Hydroxypyruvate                            | Hydroxy Acids and Derivatives            | Std  | 3.70  | 102.993  |
| 70 | Adenine                                    | Imidazopyrimidines                       | Std  | 4.66  | 134.0395 |
| 71 | Melanin                                    | Indolequinones                           | HMDB | 4.26  | 317.0608 |
| 72 | 5-Hydroxyindoleacetic acid                 | Indoles                                  | HMDB | 3.62  | 192.0636 |
| 73 | Indoleacrylic acid                         | Indoles                                  | HMDB | 20.48 | 188.0689 |
| 74 | Melatonin                                  | Indoles                                  | Std  | 18.61 | 231.1299 |
| 75 | Fructosamine                               | Monosaccharides                          | HMDB | 20.56 | 180.0915 |
| 76 | Glucosamine 6-phosphate                    | Monosaccharides                          | HMDB | 4.39  | 260.0491 |
| 77 | N-Acetyl-b-glucosaminylamine               | Monosaccharides                          | HMDB | 20.20 | 221.1115 |
| 78 | Ribulose                                   | Monosaccharides                          | HMDB | 6.51  | 151.0611 |
| 79 | Threonic acid                              | Monosaccharides                          | HMDB | 8.16  | 137.0462 |
| 80 | Phosphoric acid                            | Non-metal Oxoanionic Compounds           | HMDB | 3.59  | 98.98727 |
| 81 | Glyceraldehyde 3-phosphate                 | Organic Phosphoric Acids and Derivatives | Std  | 3.61  | 171.0056 |

|     |                                                     |                                      |      |       |          |
|-----|-----------------------------------------------------|--------------------------------------|------|-------|----------|
| 82  | L-a-glutamyl-L-Lysine                               | Peptides                             | HMDB | 19.28 | 276.1537 |
| 83  | L-leucyl-L-proline                                  | Peptides                             | HMDB | 20.37 | 229.1514 |
| 84  | L-phenylalanyl-L-proline                            | Peptides                             | HMDB | 20.49 | 263.1365 |
| 85  | Homoanserine                                        | Peptidomimetics                      | HMDB | 19.57 | 255.1444 |
| 86  | Phenylephrine                                       | Phenethylamines                      | HMDB | 18.54 | 166.0869 |
| 87  | Methylnoradrenaline                                 | Phenols and Derivatives              | HMDB | 17.77 | 182.0831 |
| 88  | Norepinephrine                                      | Phenols and Derivatives              | Std  | 3.90  | 168.0525 |
| 89  | Phenol                                              | Phenols and Derivatives              | HMDB | 3.59  | 95.04602 |
| 90  | Tyrosol                                             | Phenols and Derivatives              | HMDB | 6.15  | 137.0575 |
| 91  | Benzeneacetic acid                                  | Phenylacetic Acid Derivatives        | Std  | 19.58 | 137.0459 |
| 92  | Scopolamine                                         | Phenylacetic Acid Derivatives        | HMDB | 19.71 | 304.1513 |
| 93  | Ecgonine methyl ester                               | Piperidines                          | HMDB | 21.32 | 200.1276 |
| 94  | Perillic acid                                       | Prenol Lipids                        | HMDB | 18.41 | 165.0877 |
| 95  | 1-Methylguanosine                                   | Purine Nucleosides and Analogues     | HMDB | 19.77 | 298.1158 |
| 96  | 8-Hydroxy-deoxyguanosine                            | Purine Nucleosides and Analogues     | HMDB | 19.50 | 284.1041 |
| 97  | Guanine                                             | Purines and Purine Derivatives       | HMDB | 6.47  | 152.0559 |
| 98  | 3-Pyridylacetic acid                                | Pyridines and Derivatives            | Std  | 4.42  | 138.0509 |
| 99  | Nicotinamide N-oxide                                | Pyridines and Derivatives            | HMDB | 6.51  | 139.0518 |
| 100 | Cytidine                                            | Pyrimidine Nucleosides and Analogues | Std  | 3.88  | 242.074  |
| 101 | Pyroglutamic acid                                   | Pyrrolidines                         | Std  | 4.16  | 130.0473 |
| 102 | Phytosphingosine                                    | Sphingolipids                        | HMDB | 21.85 | 318.2983 |
| 103 | Sphinganine                                         | Sphingolipids                        | HMDB | 22.39 | 302.3033 |
| 104 | Sphingosine                                         | Sphingolipids                        | HMDB | 24.35 | 300.2876 |
| 105 | 11-Hydroxyprogesterone 11-glucuronide               | Steroids and Steroid Derivatives     | HMDB | 20.47 | 507.2612 |
| 106 | 11-Oxo-androsterone glucuronide                     | Steroids and Steroid Derivatives     | HMDB | 20.47 | 481.2486 |
| 107 | 12-Ketodeoxycholic acid                             | Steroids and Steroid Derivatives     | HMDB | 24.81 | 391.2825 |
| 108 | 21-Hydroxypregnenolone                              | Steroids and Steroid Derivatives     | Std  | 21.77 | 333.2414 |
| 109 | 3,7-Dihydroxy-12-oxocholanoic acid                  | Steroids and Steroid Derivatives     | HMDB | 21.15 | 407.2761 |
| 110 | 3 $\beta$ ,16 $\alpha$ -Dihydroxyandrostene sulfate | Steroids and Steroid Derivatives     | HMDB | 19.28 | 383.1505 |
| 111 | 3 $\beta$ -Hydroxy-5-cholenoic acid                 | Steroids and Steroid Derivatives     | HMDB | 23.33 | 375.2869 |
| 112 | 3-Oxo-4,6-choladienoic acid                         | Steroids and Steroid Derivatives     | HMDB | 21.13 | 371.2553 |
| 113 | 4-Hydroxyestrone                                    | Steroids and Steroid Derivatives     | HMDB | 19.72 | 285.1501 |
| 114 | 5 $\beta$ -Pregnanediol                             | Steroids and Steroid Derivatives     | HMDB | 21.58 | 289.2908 |
| 115 | 6-Ketoestriol                                       | Steroids and Steroid Derivatives     | HMDB | 19.59 | 303.1576 |
| 116 | 7 $\alpha$ -Hydroxy-3-oxo-5 $\beta$ -cholanoic acid | Steroids and Steroid Derivatives     | HMDB | 22.89 | 391.2822 |
| 117 | 7-Hydroxy-3-oxocholanoic acid                       | Steroids and Steroid Derivatives     | HMDB | 21.79 | 391.2823 |
| 118 | 7-Ketodeoxycholic acid                              | Steroids and Steroid Derivatives     | HMDB | 22.02 | 407.2777 |
| 119 | Glycochenodeoxycholic acid 3-glucuronide            | Steroids and Steroid Derivatives     | HMDB | 20.50 | 626.3493 |
| 120 | Nutriacholic acid                                   | Steroids and Steroid Derivatives     | HMDB | 23.48 | 391.2824 |
| 121 | Sulfolithocholic acid                               | Steroids and Steroid Derivatives     | HMDB | 20.44 | 457.2654 |
| 122 | Sulfolithocholylglycine                             | Steroids and Steroid Derivatives     | HMDB | 20.81 | 514.2827 |

---

|     |                                     |                                |      |       |          |
|-----|-------------------------------------|--------------------------------|------|-------|----------|
| 123 | Gluconate                           | Sugar Acids and Derivatives    | Std  | 3.97  | 195.053  |
| 124 | Glucuronic acid                     | Sugar Acids and Derivatives    | Std  | 3.87  | 193.0493 |
| 125 | Neuraminic acid                     | Sugar Acids and Derivatives    | HMDB | 19.55 | 268.1045 |
| 126 | trans-3-Hydroxycotinine glucuronide | Sugar Acids and Derivatives    | HMDB | 3.92  | 367.1115 |
| 127 | Erythritol                          | Sugar Alcohols                 | HMDB | 19.95 | 121.0504 |
| 128 | Hypotaurine                         | Sulfinic Acids and Derivatives | Std  | 3.60  | 110.0091 |
| 129 | Taurine                             | Sulfonic Acids and Derivatives | Std  | 3.80  | 124.0259 |
| 130 | Urobilin                            | Tetrapyrroles and Derivatives  | HMDB | 20.51 | 595.3462 |
| 131 | Biotin sulfone                      | Thienoimidazolidines           | HMDB | 4.65  | 277.0895 |

---

\*std, metabolites validated by reference standards; HMDB, annotated with Human Metabolome Database (HMDB)

**Table S3.** Short chain fatty acids in gastrointestinal contents of control rats and rats with ethanol consumption for 8 weeks ( $\mu\text{mol/g}$  wet wt).

| GI tract | Group   | Acetic acid      | Propionic Acid   | Isobutyric Acid<br>(2-methylpropanoic acid) | Butyric Acid     | 2-methylbutanoic acid | Isovaleric Acid<br>(3-methylbutanoic acid) | Valeric Acid<br>(pentanoic acid) | Caproic Acid<br>(Hexanoic acid) | Heptanoic Acid  |
|----------|---------|------------------|------------------|---------------------------------------------|------------------|-----------------------|--------------------------------------------|----------------------------------|---------------------------------|-----------------|
| Stomach  | Control | 0.053 ± 0.025    | 0.211 ± 0.167    | 0.058 ± 0.027                               | 0.093 ± 0.038    | 0.081 ± 0.052         | 0.005 ± 0.004                              | 0.027 ± 0.113                    | 0.005 ± 0.003                   | 0.003 ± 0.001   |
|          | Ethanol | 0.323 ± 0.093**  | 0.299 ± 0.108    | 0.036 ± 0.007                               | 0.372 ± 0.201    | 0.103 ± 0.051         | 0.004 ± 0.001                              | 0.022 ± 0.006                    | 0.008 ± 0.007                   | 0.003 ± 0.002   |
| Duodenum | Control | 0.003 ± 0.003    | 0.010 ± 0.007    | ND                                          | ND               | ND                    | ND                                         | ND                               | ND                              | ND              |
|          | Ethanol | 0.003 ± 0.002    | 0.005 ± 0.001    | ND                                          | ND               | ND                    | ND                                         | ND                               | ND                              | ND              |
| Jejunum  | Control | 0.059 ± 0.111    | 0.052 ± 0.011    | ND                                          | ND               | ND                    | ND                                         | ND                               | ND                              | ND              |
|          | Ethanol | 0.068 ± 0.015    | 0.059 ± 0.016    | ND                                          | ND               | ND                    | ND                                         | ND                               | ND                              | ND              |
| Ileum    | Control | 2.439 ± 0.537    | 4.559 ± 0.670    | 0.082 ± 0.014                               | 0.256 ± 0.035    | 0.254 ± 0.037         | 0.862 ± 0.127                              | 0.183 ± 0.062                    | 0.004 ± 0.001                   | 0.023 ± 0.003   |
|          | Ethanol | 6.176 ± 1.532*** | 2.768 ± 0.679**  | 0.057 ± 0.012*                              | 0.250 ± 0.047    | 0.169 ± 0.029**       | 0.565 ± 0.077***                           | 0.101 ± 0.011*                   | 0.004 ± 0.002                   | 0.015 ± 0.002** |
| Cecum    | Control | 68.030 ± 4.689   | 9.071 ± 0.912    | 0.631 ± 0.064                               | 11.679 ± 2.497   | 0.343 ± 0.095         | 0.678 ± 0.116                              | 0.596 ± 0.109                    | 0.103 ± 0.113                   | 0.026 ± 0.015   |
|          | Ethanol | 98.507 ± 23.149* | 5.660 ± 0.582*** | 0.579 ± 0.097                               | 3.917 ± 1.057*** | 0.334 ± 0.089         | 0.702 ± 0.144                              | 0.666 ± 0.139                    | 0.497 ± 0.084***                | 0.133 ± 0.045** |
| Colon    | Control | 3.302 ± 0.713    | 3.965 ± 0.832    | 0.261 ± 0.029                               | 8.406 ± 1.918    | 0.508 ± 0.078         | 0.058 ± 0.017                              | 0.070 ± 0.015                    | 0.059 ± 0.055                   | 0.012 ± 0.002   |
|          | Ethanol | 2.383 ± 0.348*   | 1.378 ± 0.259*** | 0.128 ± 0.016***                            | 1.408 ± 0.403*** | 0.108 ± 0.033***      | 0.019 ± 0.008***                           | 0.068 ± 0.053                    | 0.040 ± 0.015                   | 0.009 ± 0.003   |
| Rectum   | Control | 2.175 ± 0.416    | 2.578 ± 0.633    | 0.171 ± 0.025                               | 5.335 ± 1.966    | 0.439 ± 0.080         | 0.049 ± 0.008                              | 0.053 ± 0.011                    | 0.150 ± 0.085                   | 0.030 ± 0.030   |
|          | Ethanol | 1.858 ± 0.406    | 1.419 ± 0.295**  | 0.112 ± 0.012***                            | 1.579 ± 0.333*** | 0.140 ± 0.039***      | 0.019 ± 0.003***                           | 0.068 ± 0.044                    | 0.049 ± 0.021**                 | 0.009 ± 0.003   |

ND, Non-detectable. Values are presented as mean ± SD ( $\mu\text{mol/g}$  wet wt).

\* Significantly different from control group. \*  $P < 0.05$ ; \*\*  $P < 0.01$ ; \*\*\*  $P < 0.001$ .

**Table S4.** Branched chain amino acids in gastrointestinal contents of control rats and rats with ethanol consumption for 8 weeks ( $\mu\text{mol/g}$  wet wt).

| GI tract | Group   | Valine               | Leucine              | Isoleucine           |
|----------|---------|----------------------|----------------------|----------------------|
| Stomach  | Control | 0.016 $\pm$ 0.003    | 0.046 $\pm$ 0.011    | 0.011 $\pm$ 0.003    |
|          | Ethanol | 0.046 $\pm$ 0.015*   | 0.057 $\pm$ 0.019    | 0.053 $\pm$ 0.021*   |
| Duodenum | Control | 6.023 $\pm$ 6.725    | 3.283 $\pm$ 3.429    | 7.297 $\pm$ 8.562    |
|          | Ethanol | 1.407 $\pm$ 0.196    | 0.846 $\pm$ 0.190    | 1.417 $\pm$ 0.168**  |
| Jejunum  | Control | 5.087 $\pm$ 0.689    | 1.906 $\pm$ 0.268    | 6.686 $\pm$ 0.633    |
|          | Ethanol | 3.954 $\pm$ 1.361    | 1.334 $\pm$ 0.368*   | 4.149 $\pm$ 1.239*** |
| Ileum    | Control | 15.266 $\pm$ 3.705   | 5.272 $\pm$ 1.527    | 13.821 $\pm$ 3.210   |
|          | Ethanol | 4.456 $\pm$ 2.952*** | 1.467 $\pm$ 1.121**  | 4.200 $\pm$ 2.789**  |
| Cecum    | Control | 3.076 $\pm$ 1.342    | 0.845 $\pm$ 0.391    | 2.986 $\pm$ 1.406    |
|          | Ethanol | 0.816 $\pm$ 0.279**  | 0.256 $\pm$ 0.083**  | 0.846 $\pm$ 0.336**  |
| Colon    | Control | 0.324 $\pm$ 0.145    | 0.162 $\pm$ 0.051    | 0.375 $\pm$ 0.145    |
|          | Ethanol | 0.093 $\pm$ 0.027**  | 0.049 $\pm$ 0.015*** | 0.120 $\pm$ 0.028**  |
| Rectum   | Control | 0.264 $\pm$ 0.046    | 0.156 $\pm$ 0.031    | 0.332 $\pm$ 0.081    |
|          | Ethanol | 0.093 $\pm$ 0.032*** | 0.053 $\pm$ 0.018*** | 0.120 $\pm$ 0.032**  |

Values are presented as mean  $\pm$  SD ( $\mu\text{mol/g}$  wet wt).

\* Significantly different from control group. \*  $P < 0.05$ ; \*\*  $P < 0.01$ ; \*\*\*  $P < 0.001$ .



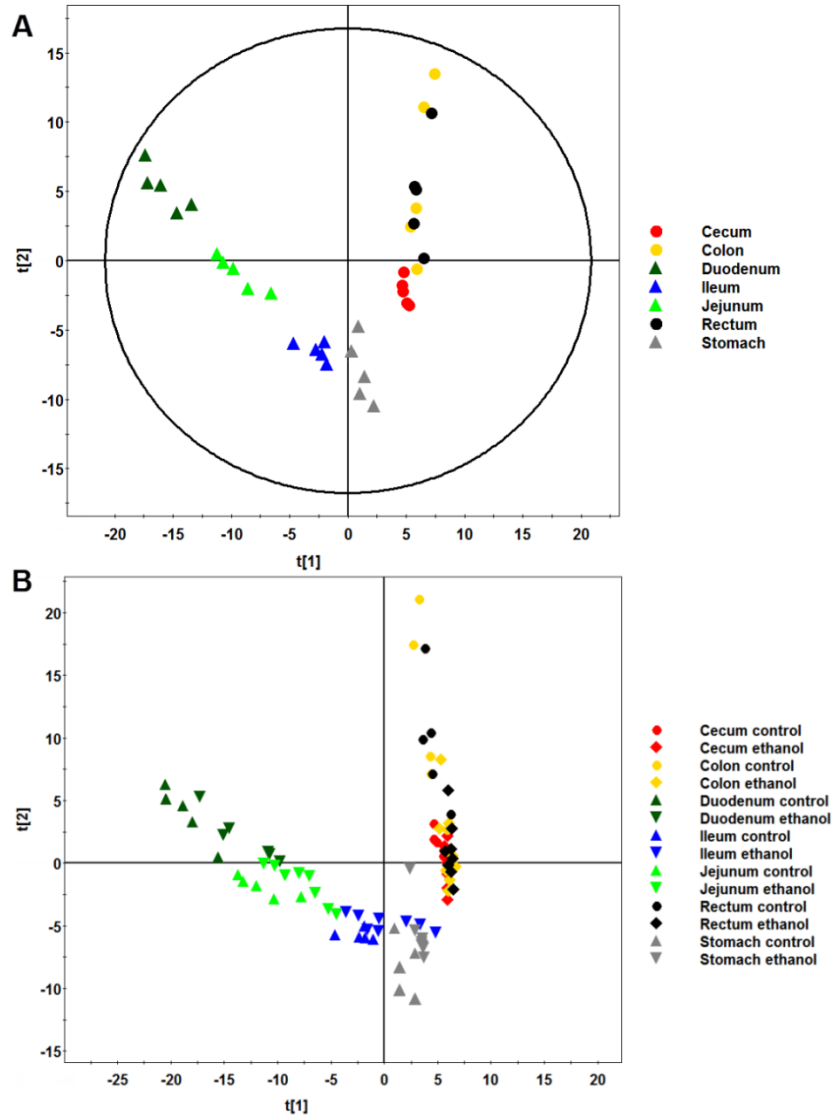

**Figure S1.** PCA scores plot obtained by analysis of contents from 7 gut compartments including stomach, Duodenum, Jejunum, Ileum, Cecum, Colon, and Rectum of control rats (A) and rats under chronic ethanol consumption (B).



**Figure S2.** Metabolic profiles (A-G) in GI contents (A, stomach; B, Duodenum; C, Jejunum; D, Ileum; E, Cecum; F, Colon; G, Rectum) of control rats. Values are mean intensities  $\pm$  SEM measured using LC-MS. \* P < 0.05 different from stomach concentration of the same metabolite.

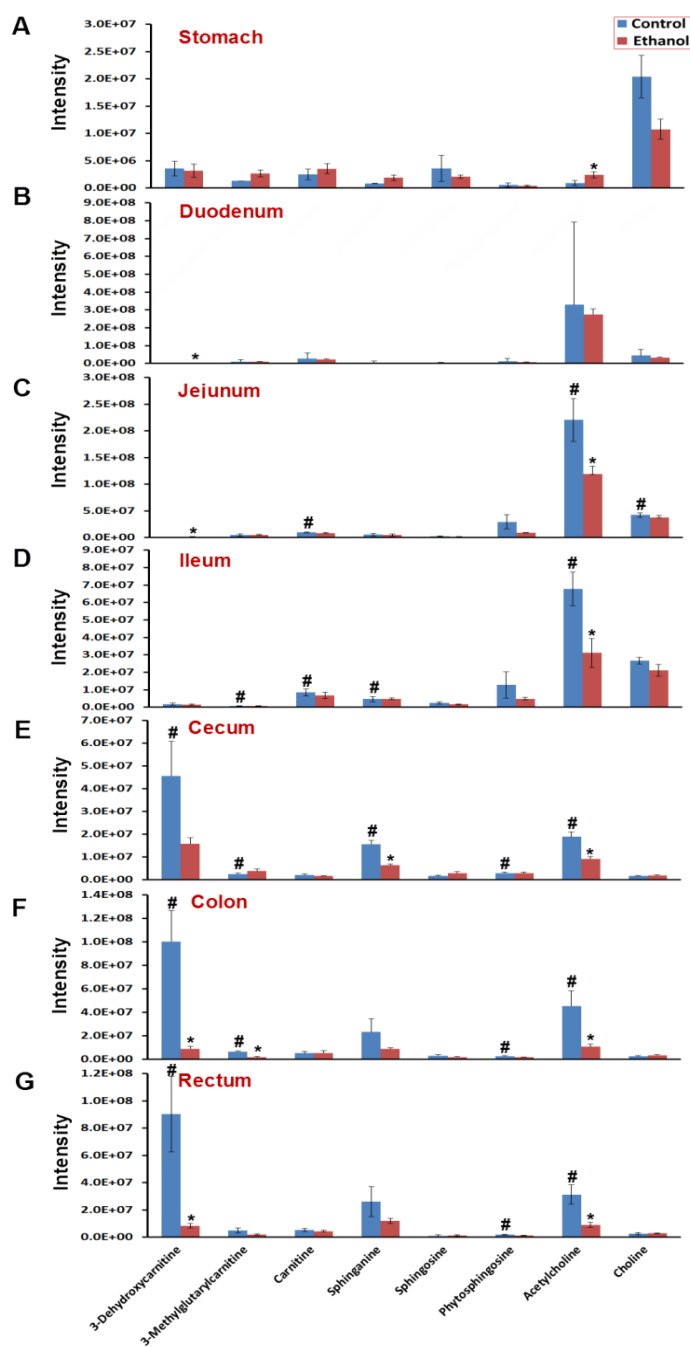

**Figure S3.** Metabolic profiles (A-G) in GI contents (A, stomach; B, Duodenum; C, Jejunum; D, Ileum; E, Cecum; F, Colon; G, Rectum) of control rats and rats with chronic ethanol consumption. Values are mean intensities ± SEM measured using LC-MS. # P < 0.05 different from stomach concentration of the same metabolite. \* p < 0.05 vs. Control group.

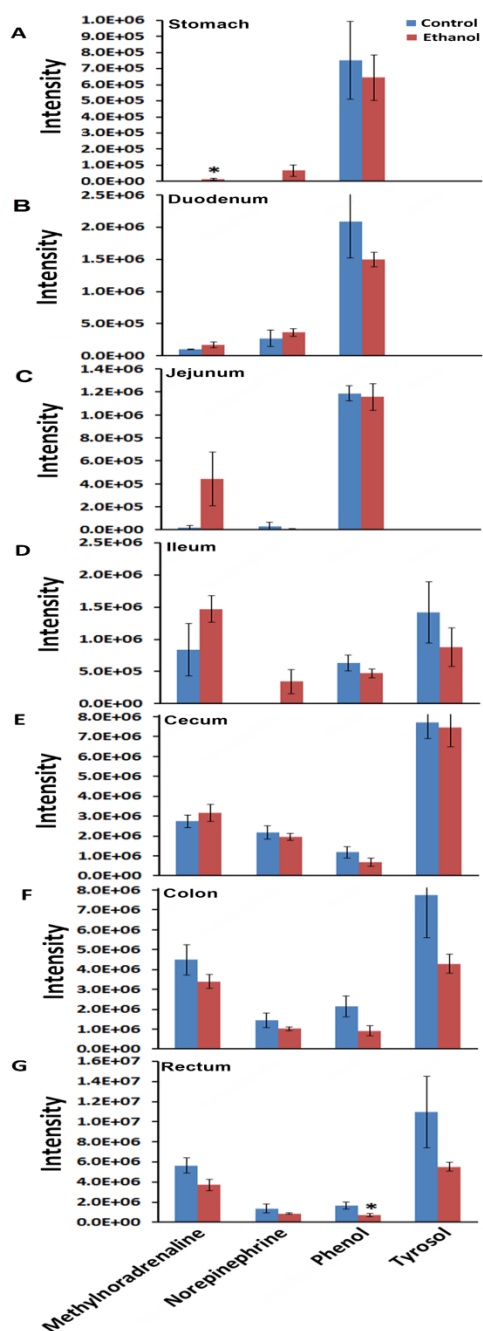

**Figure S4.** Alteration of phenol and derivatives profiles (A-G) in GI contents (A, stomach; B, Duodenum; C, Jejunum; D, Ileum; E, Cecum; F, Colon; G, Rectum) due to ethanol consumption. Values are mean intensities  $\pm$  SEM measured using LC-MS. \*P < 0.05 vs. Control group.

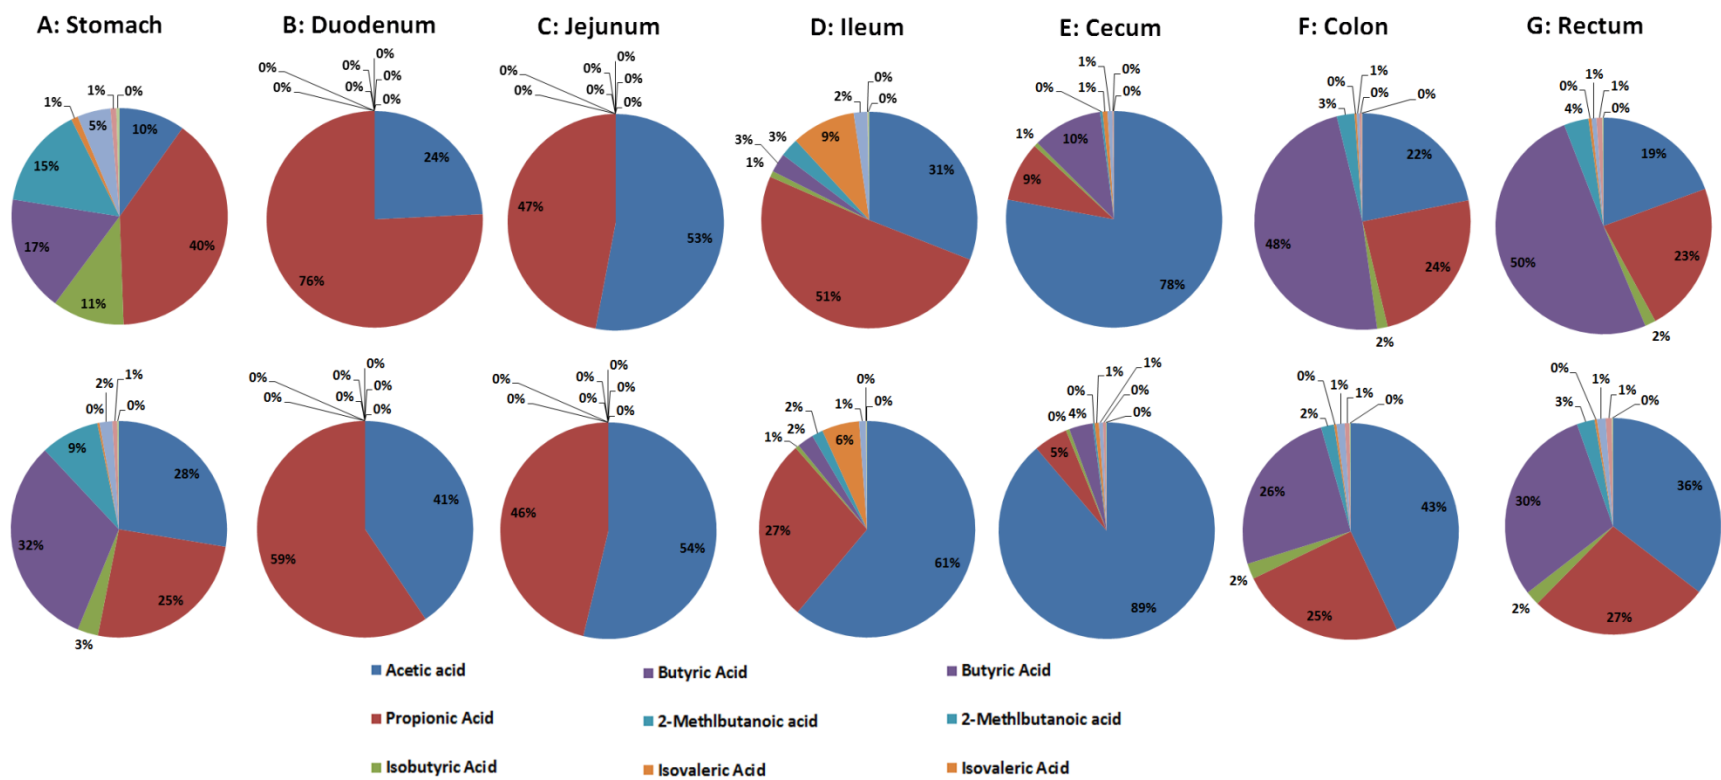

**Figure S5.** The composition of short chain fatty acids in gastrointestinal contents of control rats (upper panel) and ethanol treated rats (under panel). A, stomach; B, Duodenum; C, Jejunum; D, Ileum; E, Cecum; F, Colon; G, Rectum.
